# Supplementary figures and images for: The Holothuria leucospilota genome elucidates sacrificial organ expulsion and bioadhesive trap enriched with amyloid-patterned proteins
Source: PubMed Central journal article supplement — Proc Natl Acad Sci U S A. 2023 Apr 10;120(16):e2213512120. doi: 10.1073/pnas.2213512120 (PMC10120082; doi:10.1073/pnas.2213512120), 2023-04-10

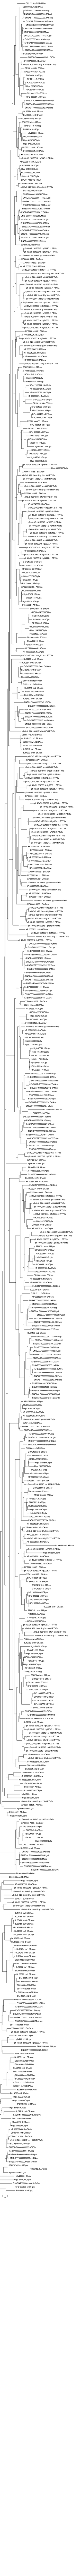

Supplement: pnas.2213512120.sd02.pdf [file pnas.2213512120.sd02.pdf]

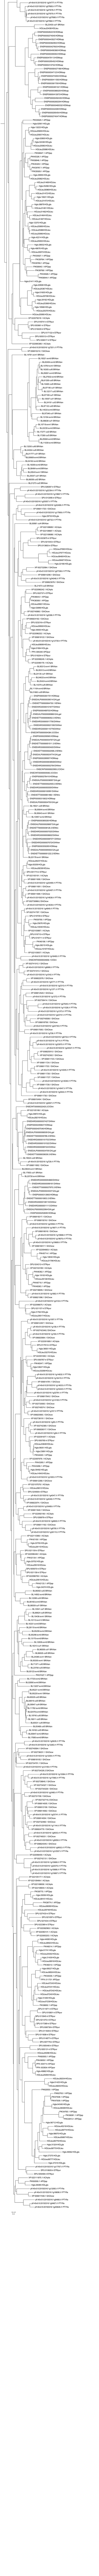

Supplement: pnas.2213512120.sd03.pdf [file pnas.2213512120.sd03.pdf]
